# Supplementary material for: Trade-offs between sperm viability and immune protein expression in honey bee queens (Apis mellifera)
Source: PubMed Central journal article supplement (PMC7794525; doi:10.1038/s42003-020-01586-w), 2021-01-08
Supplement: 42003_2020_1586_MOESM3_ESM.pdf [file 42003_2020_1586_MOESM3_ESM.pdf]

## **Description of Additional Supplementary Items**

**File name:** Supplementary Data 1 – 7

**Description:** Excel file containing the supplementary data

**Supplementary Data 1:** Sample metadata

**Supplementary Data 2:** Protein Groups (log2)

**Supplementary Data 3:** Limma output (viability)

**Supplementary Data 4:** Protein clusters (k = 666)

**Supplementary Data 5:** Target clusters

**Supplementary Data 6:** Blast2GO table

**Supplementary Data 7:** Primers for the 4 targets
